# Supplementary material for: Understanding in situ ozone production in the summertime through radical observations and modelling studies during the Clean air for London project (ClearfLo)
Source: Copernicus journal article supplement (doi:10.5194/acp-2017-827), 2017-09-21
Supplement: Supplementary file 1 [file acp-2017-827-supplement.pdf]

# Understanding in situ ozone production in the summertime through radical observations and modelling studies during the Clean air for London project (ClearfLo)

Lisa K. Whalley<sup>1,2</sup>, Daniel Stone<sup>1</sup>, Rachel Dunmore<sup>3</sup>, Jacqueline Hamilton<sup>3</sup>, James R. Hopkins<sup>3,4</sup>, James D. Lee<sup>3,4</sup>, Alistair C. Lewis<sup>3,4</sup>, Paul Williams<sup>5,6</sup>, Jörg Kleffmann<sup>7</sup>, Sebastian Laufs<sup>7</sup> & Dwayne E. Heard<sup>1,2</sup>

<sup>1</sup> School of Chemistry, University of Leeds, Leeds, LS2 9JT, UK

<sup>2</sup> National Centre for Atmospheric Science, University of Leeds, Leeds, LS2 9JT, UK

<sup>3</sup> Department of Chemistry, University of York, York, YO10 5DD, UK

<sup>4</sup> National Centre for Atmospheric Science, University of York, YO10 5DD, UK

<sup>5</sup> Centre for Atmospheric Sciences, School of Earth, Atmospheric & Environmental Sciences, University of Manchester, Manchester, M13 9PL, UK

<sup>6</sup> National Centre for Atmospheric Sciences, University of Manchester, Manchester, M13 9PL, UK

<sup>7</sup> Institute for Atmospheric & Environmental Research, Bergische Universität Wuppertal (BUW), Gaußstr. 20, 42119 Wuppertal, Germany

Correspondence to: Lisa K. Whalley ([l.k.whalley@leeds.ac.uk](mailto:l.k.whalley@leeds.ac.uk)) and Dwayne E. Heard ([d.e.heard@leeds.ac.uk](mailto:d.e.heard@leeds.ac.uk))

## Supplementary Information

### 1 Estimating the contribution of CH<sub>3</sub>O<sub>2</sub>NO<sub>2</sub> to the RO<sub>2</sub> signal

In the main paper we do not apply a correction for a possible contribution of methyl peroxy nitric acid (CH<sub>3</sub>O<sub>2</sub>NO<sub>2</sub>) to the RO<sub>2</sub> measurement (Fuchs et al., 2008). Here, however, we explore the implications of a CH<sub>3</sub>O<sub>2</sub>NO<sub>2</sub> interference on the reported RO<sub>2</sub> levels. First we make some definitions. We refer to the measurement of non-interfering RO<sub>2</sub> species (RO<sub>2</sub>*ni*) which could include a contribution from the thermal decomposition of CH<sub>3</sub>O<sub>2</sub>NO<sub>2</sub> as RO<sub>2</sub>*ni*<sup>\*</sup>:

$$[\text{RO}_2\text{ni}^*] = [\text{RO}_2\text{tot.}] - [\text{RO}_2i] - [\text{HO}_2] \quad (1)$$

If the concentration of the non-interfering RO<sub>2</sub> (RO<sub>2</sub>*ni*) is dominated by CH<sub>3</sub>O<sub>2</sub>, i.e. [RO<sub>2</sub>*ni*] ≈ [CH<sub>3</sub>O<sub>2</sub>], it becomes possible to estimate the ambient concentration of CH<sub>3</sub>O<sub>2</sub>NO<sub>2</sub> using equilibrium rate constant (K<sub>eq</sub> = 3.6 × 10<sup>-12</sup> cm<sup>3</sup> at 298 K; MCMv3.2), the uncorrected RO<sub>2</sub> radical measurements, [RO<sub>2</sub>*ni*<sup>\*</sup>], and [NO<sub>2</sub>]:

$$[\text{RO}_2\text{ni}^*] \approx [\text{CH}_3\text{O}_2] + [\text{CH}_3\text{O}_2\text{NO}_2] \quad (2)$$

$$[\text{CH}_3\text{O}_2\text{NO}_2] = K_{\text{eq}}[\text{CH}_3\text{O}_2][\text{NO}_2] \quad (3)$$

rearranging (2) and (3):

$$[\text{CH}_3\text{O}_2] = [\text{RO}_2\text{ni}^*] - [\text{CH}_3\text{O}_2\text{NO}_2] \quad (4)$$

$$[\text{CH}_3\text{O}_2] = \frac{K_{\text{eq}}[\text{NO}_2]}{[\text{CH}_3\text{O}_2\text{NO}_2]} \quad (5)$$

combining (4) and (5):

$$[\text{RO}_2ni^*] - [\text{CH}_3\text{O}_2\text{NO}_2] = \frac{K_{\text{eq}}[\text{NO}_2]}{[\text{CH}_3\text{O}_2\text{NO}_2]} \quad (6)$$

$$[\text{RO}_2ni^*] = [\text{CH}_3\text{O}_2\text{NO}_2] + \frac{K_{\text{eq}}[\text{NO}_2]}{[\text{CH}_3\text{O}_2\text{NO}_2]} \quad (7)$$

$$[\text{RO}_2ni^*] = [\text{CH}_3\text{O}_2\text{NO}_2](1 + 1/K_{\text{eq}}[\text{NO}_2]) \quad (8)$$

$$[\text{CH}_3\text{O}_2\text{NO}_2] = \frac{[\text{RO}_2ni^*]}{(1 + 1/K_{\text{eq}}[\text{NO}_2])} \quad (9)$$

Subtracting the determined methyl peroxy nitric acid concentration from  $[ni\text{RO}_2^*]$  offers a correction for this artefact:

$$[\text{RO}_2ni] = [\text{RO}_2ni^*] - [\text{CH}_3\text{O}_2\text{NO}_2] \quad (10)$$

In the following figures, both the corrected (brown) and non-corrected (dark-green)  $\text{RO}_2$  measurements are presented for comparison, where:

$$[\text{RO}_2]_{\text{CORR}} = [\text{RO}_2ni] + [\text{RO}_2i] \quad (11)$$

$$[\text{RO}_2]_{\text{NON-CORR}} = [\text{RO}_2ni^*] + [\text{RO}_2i] \quad (12)$$

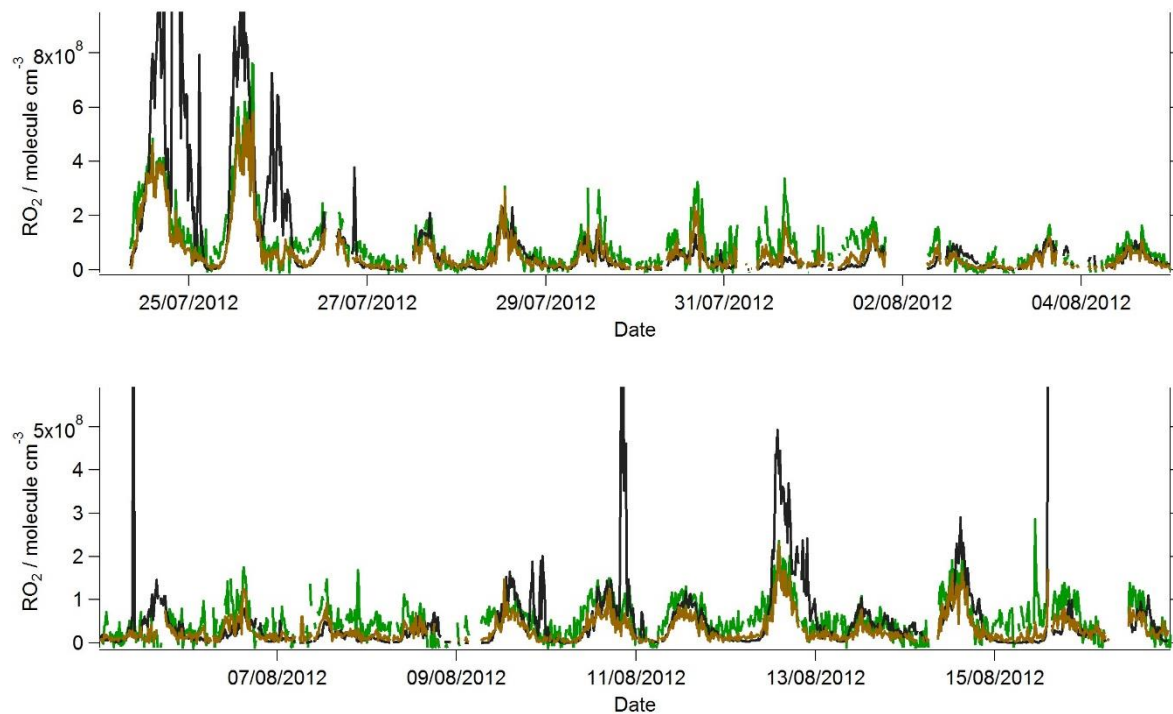

**Figure S1: Observed (coloured lines) and MCM-BASE modelled (black lines)  $\text{RO}_2$  during the summer ClearfLo IOP. Brown =  $[\text{RO}_2]_{\text{CORR}}$  (see Eqn.11) and dark-green =  $[\text{RO}_2]_{\text{NON-CORR}}$  (see Eqn.12). Data time resolution of each data point is 15 minutes.**

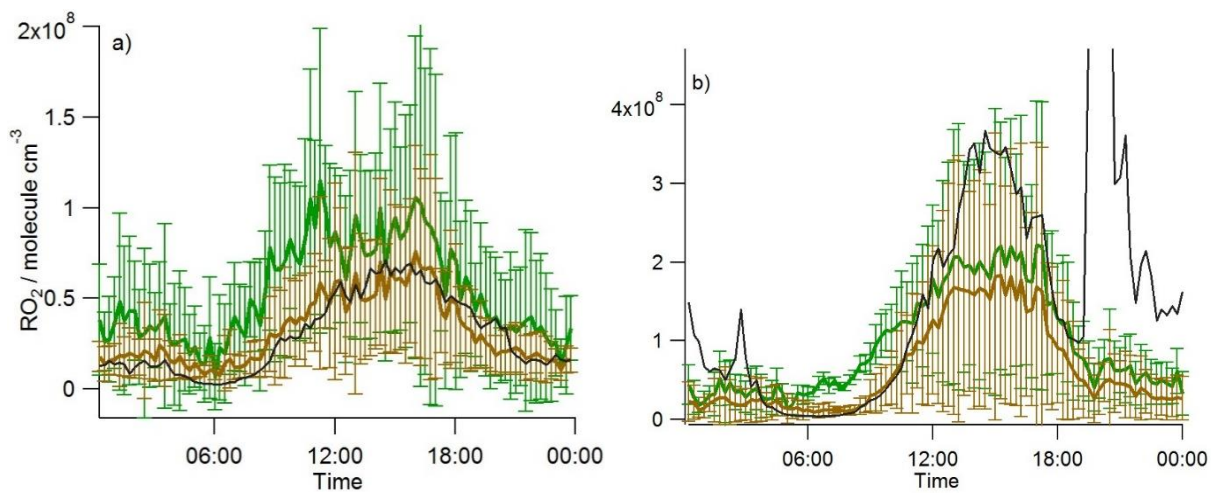

**Figure S2: Average diel observed (colour) and MCM-BASE (black) RO<sub>2</sub> profiles during a) south-westerly and b) easterly flows. Brown = [RO<sub>2</sub>]<sub>CORR</sub> (see Eqn.11) and dark-green = [RO<sub>2</sub>]<sub>NON-CORR</sub> (see Eqn.12)**

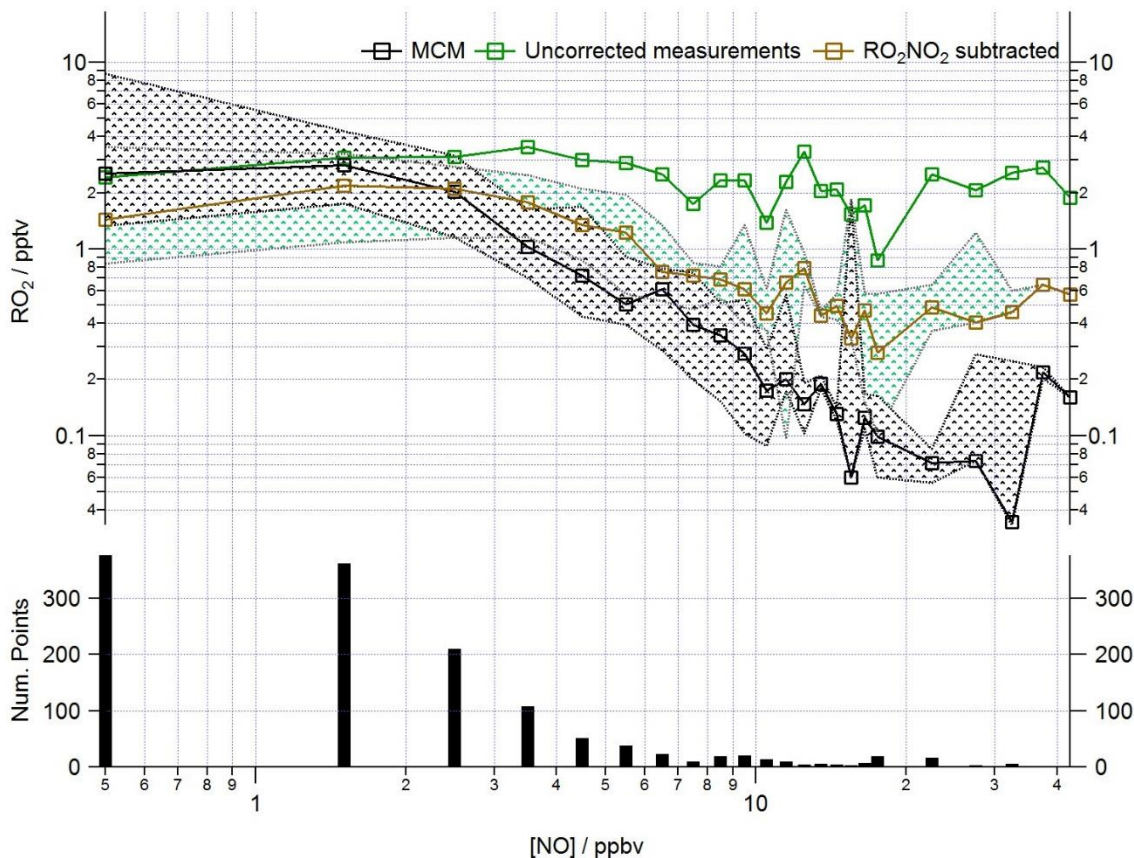

Figure S3: Median RO<sub>2</sub> measured (dark green squares = no correction for CH<sub>3</sub>O<sub>2</sub>NO<sub>2</sub> decomposition applied, brown squares = RO<sub>2</sub> with the possible contribution from CH<sub>3</sub>O<sub>2</sub>NO<sub>2</sub> decomposition subtracted) and RO<sub>2</sub> modelled (black squares); 25/75<sup>th</sup> percentiles represented by patterned areas. Data are filtered for daytime hours between 6 am and 7 pm and binned by [NO] with a bin width = 1 ppbv for [NO] between 0 – 20 ppbv and bin width = 5 ppbv for [NO] between 20 – 45 ppbv. The number of points in each bin is displayed in the lower panel.

## 2 Testing the sensitivity of the model to different model parameters

### 2.1 Deviation from a NO<sub>x</sub> photo-stationary steady state (PSS)

In this central urban location, local sources of pollution, for example emissions from nearby roads, likely influenced the radical concentrations observed. The very busy Ladbroke Grove road was approximately 75 m from the ClearfLo site and so at wind-speeds greater than 1.25 ms<sup>-1</sup>, air passing over this road would reach the site within 1 minute. Following an injection of NO from a local traffic source, it can take up to minute for NO<sub>x</sub> to reach PSS (Brune et al., 2016). It is likely, therefore, that NO<sub>x</sub> levels will have varied rapidly in time in air from the direction of Ladbroke Grove prior to reaching the ClearfLo site. In this

work, the model methodology involved running each model point to steady state conditions, i.e., for a sufficient time that the concentration of the radicals did not change for a set of model inputs. The concentration/value of the model inputs for each model time point was held constant and assumed not to vary over the time it took for the radical levels to reach steady state. At high NO concentrations, the lifetime of HO<sub>2</sub> radicals is short (e.g.  $\tau_{HO_2} = \frac{1}{k_{HO_2+NO}[NO]}$  is  $< 1$  s at an [NO] = 10 ppbv) and so under these conditions this modelling approach is likely valid. When the lifetime of HO<sub>2</sub> is longer ( $\tau_{HO_2}$  is  $\sim 45$  sec at [NO] = 100 pptv), however, the time taken for radicals to reach PSS increases and the assumption that the modelled inputs (particularly NO<sub>x</sub> concentrations) do not vary over the e-folding lifetime of HO<sub>2</sub> no longer holds. As discussed in section 3.3.1, the model is unable to capture the observed levels of HO<sub>2</sub> under low NO<sub>x</sub> conditions, i.e. when the lifetime of HO<sub>2</sub> is long, and this may, in part, relate to the way the model was run. We might expect a model to predict a lower [HO<sub>2</sub>] for an air-mass that had been transported from a region of higher [NO] and the integral [NO] over the lifetime of HO<sub>2</sub> was used rather than the [NO] observed at the end. To assess the influence of upwind emissions (and NO<sub>x</sub> being out of PSS), an additional constant local NO source = 4 ppb has been inputted into the model (MCM-NO) and this helps to bring the modelled HO<sub>2</sub> into agreement with the measurements (brown line, Fig. S4). However, the model further over-predicts OH concentrations and under-predicts RO<sub>2</sub> by close to a factor of two in this scenario (see Fig. S4), indicating that deviations from NO<sub>x</sub> PSS over the lifetime of HO<sub>2</sub> alone cannot reconcile the discrepancies between the model and observations for all of the radicals.

## 2.2 Missing HO<sub>2</sub> radical sink

Including a first order loss process for HO<sub>2</sub> equal to 0.3 s<sup>-1</sup> in the model (MCM- $k_{loss0.3}$ ) improves the model measurement agreement during the daytime for HO<sub>2</sub> considerably (grey, solid line, Fig. S4, HO<sub>2</sub> panel only). The impact on local ozone production if this sink is overlooked in a model is explored in section 4.2 (main manuscript). Although in general the model-to-measured agreement for the peroxy radicals improves when a large first order loss process for HO<sub>2</sub> is included, under south westerly conditions total RO<sub>2</sub> concentration is further under-predicted during the day by MCM- $k_{loss0.3}$  (not shown in Fig. S4 for clarity, but has very similar profile to MCM-HO<sub>2</sub>). The model has a tendency to under-predict OH reactivity (Whalley et al., 2016) during the day under the south westerly flows (by up to 25 %) even when an extended VOC suite and the model intermediate contribution to OH reactivity is considered. This suggests that the model may be missing VOCs under this air-mass regime and this, in turn may contribute to the model under-prediction of RO<sub>2</sub>.

With the inclusion of this large HO<sub>2</sub> sink, [OH]<sub>MCM- $k_{loss0.3}$</sub>  closely resembles OH<sub>PSS</sub> and the observed OH is under-predicted slightly during the afternoon during the first easterly air-mass encountered.

## 2.3 Under-estimating the heterogeneous HO<sub>2</sub> sink

Uptake probabilities of less than  $\gamma_{HO_2} = 0.02$  to sub-micron aerosols at room temperature have been reported (George et al., 2013) for inorganic salts. Enhanced uptakes (up to  $\gamma_{HO_2} = 0.5$ ), however, have been reported on aerosols containing Cu or Fe ions (Mozurkewich et al., 1987; Lakey et al., 2016). Changes in physical parameters such as temperature or pH have also been

shown in laboratory studies (Lakey, 2014) and in the field (Whalley et al., 2015) to change the value of  $\gamma_{HO_2}$ . Combustion processes are considered important sources of Cu-containing sub-micron aerosols (Mao et al., 2013) and so in an urban environment, characterised by high vehicular emissions, some enhancements in the uptake coefficient may be expected due to the presence of these ions within the aerosols. In the base model discussed thus far, an uptake probability of 0.1 was assumed to reflect possible enhancements. Other modelling studies have considered a range of  $HO_2$  uptake probabilities in attempt to resolve model over-predictions e.g. (Emmerson et al., 2007). Figure S4, (grey dashed line) shows the maximum possible impact of this  $HO_2$  sink term by increasing the uptake probability from 0.1 to 1. This enhancement only reduces the modelled  $HO_2$  concentration modestly, with improvements most significant during the easterly flows when aerosol surface area was most elevated. Despite these reductions, significant over-predictions remain, demonstrating that heterogeneous loss to aerosol surfaces alone cannot resolve the model measurement discrepancy.

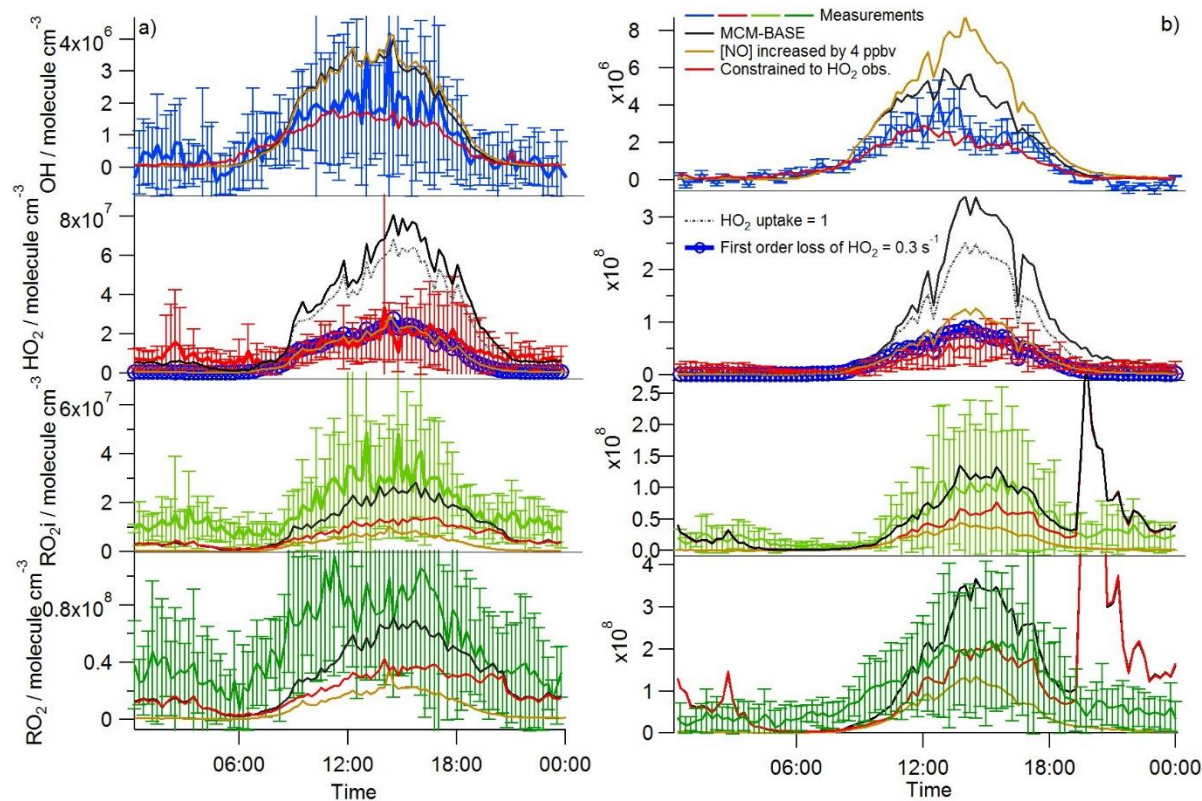

**Figure S4:** Average diel observed and modelled  $HO_x$  profiles during a) south-westerly and b) easterly flows. The MCM base model predictions are shown in black. The model scenario (MCM-NO) where the modelled NO concentration was increased by 4 ppbv is shown in brown. The red line is the model scenario constrained to the observed  $HO_2$  (MCM- $HO_2$ ).  $HO_2$  panel only: The grey dashed line is the model scenario where an  $HO_2$  uptake coefficient to aerosol = 1 was included (MCM- $\gamma_{HO_2}$ ) and blue open circles represents the model scenario where a constant first order loss of  $HO_2$  equal to  $0.3 \text{ s}^{-1}$  is included (MCM- $k_{\text{loss}0.3}$ ).



## References

- Brune, W. H., Baier, B. C., Thomas, J., Ren, X., Cohen, R. C., Pusede, S. E., Browne, E. C., Goldstein, A. H., Gentner, D. R., Keutsch, F. N., Thornton, J. A., Harrold, S., Lopez-Hilfiker, F. D., and Wennberg, P. O.: Ozone production chemistry in the presence of urban plumes, *Faraday Discuss*, 189, 169-189, 10.1039/c5fd00204d, 2016.
- Emmerson, K. M., Carslaw, N., Carslaw, D. C., Lee, J. D., McFiggans, G., Bloss, W. J., Gravestock, T., Heard, D. E., Hopkins, J., Ingham, T., Pilling, M. J., Smith, S. C., Jacob, M., and Monks, P. S.: Free radical modelling studies during the UK TORCH Campaign in Summer 2003, *Atmos Chem Phys*, 7, 167-181, 2007.
- Fuchs, H., Holland, F., and Hofzumahaus, A.: Measurement of tropospheric RO<sub>2</sub> and HO<sub>2</sub> radicals by a laser-induced fluorescence instrument, *Rev Sci Instrum*, 79, Artn 084104  
10.1063/1.2968712, 2008.
- George, I. J., Matthews, P. S. J., Whalley, L. K., Brooks, B., Goddard, A., Romero, M. T. B., and Heard, D. E.: Measurements of uptake coefficients for heterogeneous loss of HO<sub>2</sub> onto submicron inorganic salt aerosols, *Physical Chemistry Chemical Physics*, 15, 12859-12845, 2013.
- Lakey, P. S. J.: Heterogeneous uptake of HO<sub>2</sub> radicals onto atmospheric aerosols, PhD, School of Chemistry, University of Leeds, Leeds, 2014.
- Lakey, P. S. J., George, I. J., Baeza-Romero, M. T., Whalley, L. K., and Heard, D. E.: Organics Substantially Reduce HO<sub>2</sub> Uptake onto Aerosols Containing Transition Metal ions, *J Phys Chem A*, 120, 1421-1430, 10.1021/acs.jpca.5b06316, 2016.
- Mao, J., Fan, S., Jacob, D. J., and Travis, K. R.: Radical loss in the atmosphere from Cu-Fe redox coupling in aerosols, *Atmos Chem Phys*, 13, 509-519, 10.5194/acp-13-509-2013, 2013.
- Mozurkewich, M., Mcmurry, P. H., Gupta, A., and Calvert, J. G.: Mass Accommodation Coefficient for Ho<sub>2</sub> Radicals on Aqueous Particles, *J Geophys Res-Atmos*, 92, 4163-4170, Doi 10.1029/Jd092id04p04163, 1987.
- Whalley, L. K., Stone, D., George, I. J., Mertes, S., van Pinxteren, D., Tilgner, A., Herrmann, H., Evans, M. J., and Heard, D. E.: The influence of clouds on radical concentrations: observations and modelling studies of HO<sub>x</sub> during the Hill Cap Cloud Thuringia (HCCT) campaign in 2010, *Atmos Chem Phys*, 15, 3289-3301, 10.5194/acp-15-3289-2015, 2015.
